# Supplementary material for: Injectable strontium-doped hydroxyapatite integrated with phosphoserine-tethered poly(epsilon-lysine) dendrons for osteoporotic bone defect repair
Source: Royal Society of Chemistry journal article supplement (doi:10.1039/c8tb02526f), 2018-01-01
Supplement: c8tb02526f1.pdf [file c8tb02526f1.pdf]

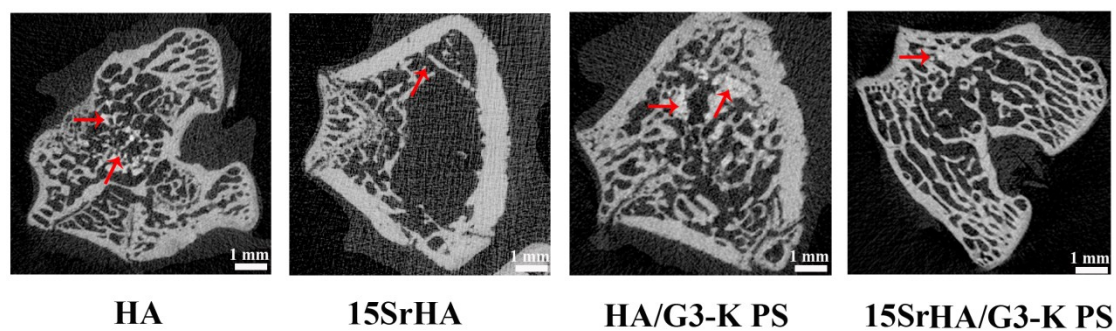

Fig. A.1. The greyscale  $\mu$ -CT images of various HA gel materials after in vivo implantation (red arrow indicate non-degraded materials).
